# 1 Hypoxic-Ischemic Encephalopathy Based on clinical biomarkers and 2 associated risk factors in Neonates from Southern Ethiopian Public Hospitals: 3 A Case Control Study

4 Getnet Melaku Ayele<sup>1,2\*</sup>; Getachew Mergia<sup>2†</sup>; Senait Belay Getahun<sup>1†</sup>; Selamawit Semagn Kebede<sup>3†</sup>; Zemedu  
5 Awoke Ferede<sup>4†</sup>; Robel Hussien Kabthiymer<sup>5†</sup>; Mesfin Abebe<sup>1†</sup>

6 <sup>1</sup>Department of Midwifery, Dilla University, Dilla, Ethiopia

7 <sup>2</sup>Department of Obstetrics and Gynecology, Dilla University, Dilla, Ethiopia

8 <sup>3</sup>Department of Reproductive Health, Dilla University, Dilla, Ethiopia

9 <sup>4</sup>Department of Anesthesiology, Dilla University, Dilla, Ethiopia

10 <sup>5</sup>Department of Human Nutrition, Dilla University, Dilla, Ethiopia

11 \*Corresponding Author: [getsen12@gmail.com](mailto:getsen12@gmail.com)

12 †These authors contributed equally to this work.

13 **Email addresses:** Getnet Melaku Ayele<sup>1</sup>: [getsen12@gmail.com](mailto:getsen12@gmail.com); ORCID number: [https://orcid.org/0000-0002-](https://orcid.org/0000-0002-6760-4867)  
14 [6760-4867](https://orcid.org/0000-0002-6760-4867); Getachew Mergia<sup>2</sup>: [gmergia762@gmail.com](mailto:gmergia762@gmail.com); Senait Belay Getahun<sup>1</sup>: [seni1203b@gmail.com](mailto:seni1203b@gmail.com) ;  
15 Selamawit Semagn Kebede<sup>3</sup>: [memymine0@gmail.com](mailto:memymine0@gmail.com); Zemedu Awoke Ferede<sup>4</sup>: [zemeduawoke@yahoo.com](mailto:zemeduawoke@yahoo.com); Robel  
16 Hussien Kabthiymer<sup>5</sup>: [robelk@du.edu.et](mailto:robelk@du.edu.et); Mesfin Abebe<sup>1</sup>: [mesfiaau@gmail.com](mailto:mesfiaau@gmail.com);

## 17 Abstract

18 Hypoxic ischemic encephalopathy (HIE) is a serious condition that results from reduced oxygen supply and blood  
19 flow to the brain, leading to brain injury and potential long-term neurodevelopmental impairments. This study aimed  
20 to identify the maternal and neonatal factors that are associated with HIE among newborns in Ethiopia. An  
21 unmatched-control study was conducted in fifteen public hospitals in Southern Nation Nationalities and the Peoples

22 Regional State of Ethiopia. Data were collected from 515 newborns with their index mothers (175 cases and 340  
23 controls) using a structured questionnaire and clinical records which were created and managed by Kobo software  
24 for mobile-assisted data collection. Clinical biomarkers were used to diagnose Hypoxic ischemic encephalopathy.  
25 Logistic regression analysis was performed to identify the factors associated with Hypoxic ischemic  
26 encephalopathy. Maternal education, ultrasound checkup status, gestational age at delivery, mode of delivery, and  
27 labor duration were significantly associated with Hypoxic ischemic encephalopathy. Newborns born to illiterate  
28 mothers (AOR= 1.913, 95%CI: 1.177, 3.109), those whose mothers did not have an ultrasound checkup during  
29 pregnancy (AOR= 1.859, 95%CI: 1.073, 3.221), those who were born preterm (AOR= 4.467, 95%CI: 1.993, 10.012)  
30 or post-term (AOR= 2.903, 95%CI: 1.325, 2.903), those who were delivered by cesarean section (AOR= 7.569,  
31 95%CI: 4.169, 13.741), and those who were delivered after prolonged labor (AOR= 3.591, 95%CI: 2.067, 6.238)  
32 had higher odds of developing Hypoxic ischemic encephalopathy than their counterparts. This study provides  
33 valuable insights into the risk factors for Hypoxic ischemic encephalopathy among newborns in Southern Ethiopia.  
34 Improving maternal education and health care services during pregnancy and delivery may help reduce the incidence  
35 and severity of Hypoxic ischemic encephalopathy. Future research should use laboratory or imaging investigations,  
36 including private health institutions, and explore the mechanisms and outcomes of Hypoxic ischemic  
37 encephalopathy.

38 **Keywords:** APGAR score, Hypoxic Ischemic Encephalopathy, Neonates, Index mothers, Clinical Biomarkers

## 39 **Introduction**

40 Hypoxic-ischemic encephalopathy (HIE) is a type of brain dysfunction that occurs when the brain does not receive  
41 enough oxygen or blood flow for a period of time [1]. It can cause severe and permanent neurological impairments,  
42 such as cerebral palsy, epilepsy, developmental delay, and cognitive impairment which is a leading cause of death or  
43 severe disability among infants worldwide[2, 3].

44 The incidence and risk factors of HIE may vary depending on the geographic region and the level of health care  
45 available. In high-income countries, the most common cause of HIE is perinatal asphyxia due to complications  
46 during labor and delivery, such as umbilical cord problems, placental abruption, or fetal distress whereas in low- and

47 middle-income countries, it may also result from maternal or fetal infections, anemia, malnutrition, or lack of  
48 antenatal care [4, 5].

49 The global incidence of HIE is 1.5 per 1000 live births, but it varies by region and income level. Low- and middle-  
50 income countries have higher rates of HIE (1.8 per 1000 live births) than high-income countries (0.5 per 1000 live  
51 births). Within low- and middle-income countries, the incidence of HIE ranges from 1.6 to 7.9 per 1000 live births,  
52 with sub-Saharan Africa having the highest rate of 3.1 per 1000 live births and accounting for 30% of the global  
53 burden of HIE. In high-income countries, the incidence of HIE ranges from 0.3 to 2.6 per 1000 live births [4, 6].

54 There is a lack of reliable data on the incidence of HIE in Ethiopia, but some studies have estimated it to be between  
55 10.7 and 30.9 per 1000 live births. The main causes of HIE in Ethiopia are infections in the mother or the baby, long  
56 labor, lack of oxygen at birth, and blood infection in the baby. The incidence of HIE in southern Ethiopia is also  
57 unclear, but one study found it to be 11.5 per 1000 live births at a tertiary hospital in northern Tanzania, which may  
58 be similar to southern Ethiopia [6, 7].

59 To detect hypoxic-ischemic insult, we can use clinical signs and physical exams as biomarkers. Clinical signs  
60 include low Apgar scores, low cord pH, neonatal seizures, and encephalopathy. Physical exams include monitoring  
61 brain function, such as level of consciousness, muscle tone, posture, reflexes, and autonomic function. A 5th min  
62 APGAR score of <7 or a 10th min APGAR score of <4 also indicate hypoxic-ischemic insult [8-10].

63 Ethiopia is a low-income country in Sub-Saharan Africa with a high neonatal mortality rate of 23 deaths per 1000  
64 live births in which the prevalence and causes of HIE are not well documented, but some studies have suggested that  
65 maternal infections, prolonged labor, birth asphyxia, preterm birth, cord prolapse, post term pregnancy, vacuum  
66 mode of delivery, male sex newborn, and neonatal sepsis are common risk factors. In addition, there is also a lack of  
67 standardized protocols and resources for the diagnosis and management of HIE in Ethiopian public hospitals [1, 11-  
68 14].

69 Several studies conducted in both developed and developing countries revealed that HIE is predicted by factors  
70 related to antepartum, intrapartum, neonatal, and nutritional conditions. Most of the HIE (70.3%) is due to  
71 intrapartum factors. Some of the antenatal factors are being a first-time mother, having a previous fetal  
72 death/stillbirth, using antidepressants or illicit drugs, having Rh sensitization, and gaining more than 13.6 kg of

73 weight during pregnancy. Some of the intrapartum factors are having a placental abruption, a ruptured uterus, a  
74 moderate-to-heavy amount of meconium in the amniotic fluid and having a cesarean-section delivery. These factors  
75 are present in 70.3% of the HIE cases [15-19].

76 Hypoxic-ischemic encephalopathy (HIE) is a serious condition that affects newborns who experience oxygen  
77 deprivation and reduced blood flow to the brain which can cause brain damage, seizures, developmental delays, and  
78 cerebral palsy [20, 21]. However, the risk factors and biomarkers associated with HIE in neonates from southern  
79 Ethiopian public hospitals are not well understood. Therefore, this study aims to identify the risk factors based on  
80 clinical biomarkers associated with HIE in neonates born at public hospitals in Southern Ethiopia. This will help to  
81 improve the early detection and treatment of HIE and to reduce the morbidity and mortality associated with this  
82 condition.

83 **Research question:** What are the risk factors associated with HIE in neonates from southern Ethiopian public  
84 hospitals?

85 **Hypothesis:** Neonates with HIE have higher rates of antenatal, intra-partum, neonatal, and nutritional risk factors  
86 than neonates without HIE.

## 87 **Materials and Methods**

### 88 **Study area, study aim and design**

89 An institution-based unmatched case-control study was conducted in public hospitals of SNNPR, Ethiopia from June  
90 2022 to March 2023 to identify risk factors based on clinical biomarkers associated with Hypoxic-Ischemic  
91 Encephalopathy in Neonates.

### 92 **Study population and Methods**

93 The study population consisted of neonates born at public hospitals in SNNPR. Cases were neonates who had HIE  
94 diagnosed at public hospitals in Southern Ethiopia during the study period, while controls were neonates who did

95 not have HIE diagnosed in the same area and period. Newborns that had any condition that made them unable to  
96 survive outside the womb were excluded from the study.

97 We considered the following exposure variables to calculate the sample size: maternal anemia, fetal presentation,  
98 color of amniotic fluid and mode of delivery. We chose maternal anemia as an independent variable because it  
99 yielded the largest sample size compared to other exposure variables. We used Open Epi version 7 statistical  
100 software package and a formula for two population proportions to calculate the sample size. Based on a previous  
101 study in southern Ethiopia, we assumed that 6.74% of the controls (newborns who had adequate breathing and/or cry  
102 and APGAR score >7) were exposed [22].

103 We made the following assumptions for the sample size calculation: 17.98% of the cases were exposed, a 95% CI,  
104 80% power of the study, and a 2:1 ratio of controls to cases with a 3.87 odds ratio. This resulted in a sample size of  
105 243 newborns (81 cases and 162 controls). However, since the study was regional and had multiple stages, we  
106 applied a design effect and doubled the sample size to 486 newborns (162 cases and 324 controls). We also  
107 accounted for a 10% nonresponse rate and aimed to study **535** newborns (178 cases and 357 controls).

108 We selected 15 out of 79 government hospitals in SNNPR by proportionally allocating samples to each hospital  
109 based on the average case flow estimated by enrollment. We used well-designed data collection tools and trained  
110 data collectors on how to observe deliveries, APGAR scoring, clinical signs of HIE and fill data to ensure data  
111 quality. We created the instrument by reviewing various sources of literature. To ensure its accuracy and clarity, we  
112 translated it from English to Amharic and then back to English. We used a pre-tested structured questionnaire to  
113 collect data from the participants [7, 23, 24].

114 We used Kobo toolbox, a free and open-source application, to design, manage and collect data for our questionnaire.  
115 Kobo toolbox allows us to collect data online or offline using mobile devices, and to analyze and visualize data  
116 easily. We selected Kobo toolbox because of its user-friendly, secure, and reliable interface. It also offers features  
117 that enhance data quality control, such as validation rules and skip logic. Our data collectors were professional  
118 midwives and nurses who worked at different hospitals from where they collected data.

119

## 120 **Operational definitions**

121 **Hypoxic-ischemic encephalopathy (HIE):** A type of brain dysfunction that occurs when a newborn does not  
122 receive enough oxygen and blood flow during or after birth.

123 **Diagnosis of HIE:** To diagnose HIE, the researcher used clinical signs and physical exams. The clinical signs were  
124 low Apgar scores (below 7 at 5 minutes or below 4 at 10 minutes) and neonatal seizures. The physical exams  
125 evaluated consciousness, muscle tone, posture, reflexes, and autonomic function. **Clinical Biomarkers:** The  
126 researcher used the following clinical biomarkers to indicate HIE: Apgar scores, neonatal seizures, level of  
127 consciousness, muscle tone, posture, reflexes, and autonomic function. **Cases:** Newborns who were delivered and  
128 diagnosed with Hypoxic-ischemic encephalopathy were considered as cases. **Controls:** Newborns who were  
129 delivered and did not have hypoxic-ischemic encephalopathy (normal).

## 130 **Data processing and analysis**

131 We used SPSS version-26 to enter and analyze the data. We ensured the data quality and performed descriptive and  
132 inferential statistics. We used cross-tabulation and logistic regression to assess the relationship between dependent  
133 and independent variables. We controlled confounding factors by using adjusted odds ratio (AOR). We set the  
134 significance level at 0.05 and the confidence level at 95%.

## 135 **Ethics approval and consent to participate**

136 This research followed the Declaration of Helsinki's recommendation to consider the potential benefits for the  
137 participants [25, 26]. Studying the risk factors of HIE involves ethical and methodological issues that are specific to  
138 human subjects research. Therefore, this study adhered to the WHO's ethical and safety guidelines for human  
139 subjects' research [27]. The Institutional Review Board (IRB) of Dilla University, College of Medicine and Health  
140 Sciences approved this study ethically (protocol unique number 010/18-06) and wrote an official support letter to the  
141 regional health department of SNNPR. The regional health department also gave an official letter to each selected  
142 hospital. Moreover, the index mothers of the neonates who participated in the study gave their written consent after

143 being informed about the study. The study participants were free to withdraw from the study at any point during data  
144 collection.

## 145 **Results:**

### 146 **Maternal Socio-demographic and reproductive characteristic**

147 This study included 175 neonates with Hypoxic Ischemic Encephalopathy (HIE) (cases) and their index mothers,  
148 and 340 neonates without Hypoxic Ischemic Encephalopathy (controls) and their index mothers, with a response  
149 rate of 96.26%. The mean age of the mothers in the study was 26.57 years (+SD=4.317). The occupational status of  
150 the index mother showed that more than forty-eight percent of the mothers who delivered babies with HIE (cases)  
151 and more than thirty percent of the mothers whose newborns were normal (controls) were unemployed. Regarding  
152 the duration of the current pregnancy, most of the mothers (54.9% of cases and 52.1% of controls) delivered their  
153 babies at term (38-42 weeks of gestation). However, a significant proportion of mothers (18.9% of cases and 17.1%  
154 of controls) experienced some illness during their current pregnancy (**Table 1**).

155 Table 1: Maternal Socio-Demographic and Reproductive Characteristics of Newborns Delivered at Public Hospitals  
156 in Southern Ethiopia, 2023 (n=515)

| Variable                         | Category      | Case n=175 (%) | Control n=340 (%) | Total n=515 (%) |
|----------------------------------|---------------|----------------|-------------------|-----------------|
| Occupation of index mother       | Unemployed    | 85 (48.6)      | 104 (30.6)        | 189 (36.7)      |
|                                  | Employed      | 90 (51.4)      | 236 (69.4)        | 326 (63.3)      |
| Maternal educational status      | Literate      | 99 (56.6)      | 252 (74.1)        | 351 (68.2)      |
|                                  | Illiterate    | 76 (43.4)      | 88 (25.9)         | 164 (31.8)      |
| Pregnancy status                 | Singleton     | 94 (53.7)      | 196 (57.6)        | 290 (56.3)      |
|                                  | Multiple (>2) | 81 (46.3)      | 144 (42.4)        | 225 (43.7)      |
| Parity                           | Primi         | 68 (38.9)      | 109 (32.1)        | 177 (34.4)      |
|                                  | Multi         | 107 (61.1)     | 231 (67.9)        | 338 (65.6)      |
| Duration of current pregnancy    | <= 37 weeks   | 66 (37.7)      | 105 (30.9)        | 171 (33.2)      |
|                                  | 38 - 42 weeks | 96 (54.9)      | 177 (52.1)        | 273 (53.0)      |
|                                  | 42+ weeks     | 13 (7.4)       | 58 (17.1)         | 71 (13.8)       |
| History of bad pregnancy outcome | Miscarriage   | 58 (33.1)      | 129 (37.9)        | 187 (36.3)      |
|                                  | Still birth   | 87 (49.7)      | 119 (35.0)        | 206 (40.0)      |
|                                  | Child death   | 30 (17.1)      | 92 (27.1)         | 122 (23.7)      |

### 157 **Prenatal Factors Associated with Hypoxic Ischemic Encephalopathy**

158 This study examined antepartum, intra-partum, nutritional and neonatal factors. During their current pregnancy,  
159 about nineteen percent of cases and eighteen percent of controls had some illness among the index mothers who

160 participated in the study. Of these, 36.4% of cases and 32.2% of controls were anemic during their antepartum  
 161 period. Concerning the ANC visit status of the index mothers, 82 (59.9%) cases and 154 (51.2%) controls did not  
 162 finish their fourth ANC visit. Moreover, 68 (89.5%) of mothers whose babies had HIE (cases) and 191 (80.9%) of  
 163 mothers whose babies were normal (without HIE diagnosis or controls) had normal amniotic fluid volume (Table 2).

164 Table 2: Prenatal Factors Associated with Hypoxic Ischemic Encephalopathy among Newborns Delivered at Public  
 165 Hospitals in Southern Ethiopia, 2023 (n=515)

| Variable                                            | Category              | Case n=175 (%) | Control n=340 (%) | Total n=515 (%) |
|-----------------------------------------------------|-----------------------|----------------|-------------------|-----------------|
| Illness during pregnancy?                           | Yes                   | 33 (18.9)      | 58 (17.1)         | 91 (17.1)       |
|                                                     | No                    | 142 (81.1)     | 282 (82.9)        | 424 (82.3)      |
| Types of Illness during pregnancy                   | Hypertension          | 13 (39.4)      | 34 (57.6)         | 47 (51.1)       |
|                                                     | Anemia                | 12 (36.4)      | 19 (32.2)         | 31 (33.7)       |
|                                                     | Bleeding              | 8 (24.2)       | 6 (10.2)          | 14 (15.2)       |
| ANC visits during pregnancy                         | Yes                   | 137 (78.3)     | 301 (88.5)        | 438 (85.0)      |
|                                                     | No                    | 38 (21.7)      | 39 (11.5)         | 77 (15.0)       |
| ANC visit status                                    | Completed ANC 4th     | 55 (40.1)      | 147 (48.8)        | 202 (46.1)      |
|                                                     | Not Completed ANC 4th | 82 (59.9)      | 154 (51.2)        | 236 (53.9)      |
| Ultrasound check up during your time of pregnancy   | Yes                   | 91 (52.0)      | 234 (68.8)        | 325 (63.1)      |
|                                                     | No                    | 84 (48.0)      | 106 (31.2)        | 190 (36.9)      |
| Amniotic fluid status checkup during pregnancy time | Yes                   | 76 (43.4)      | 236 (69.4)        | 312 (60.6)      |
|                                                     | No                    | 99 (56.6)      | 104 (30.6)        | 203 (39.4)      |
| The status of amniotic fluid                        | Polyhydramnios        | 4 (5.3)        | 25 (10.6)         | 29 (9.3)        |
|                                                     | Oligohydramnios       | 4 (5.3)        | 20 (8.5)          | 24 (7.7)        |
|                                                     | Normal                | 68 (89.5)      | 191 (80.9)        | 259 (83.0)      |

166  
 167 **Intra-partum Factors Associated with Hypoxic Ischemic**  
 168 **Encephalopathy (HIE)**

169 We assessed many intrapartum-related variables at the time of labor and delivery. We found that most of the  
 170 neonates with HIE (cases) (86.9%) and without HIE (controls) (98.2%) had a cephalic presentation. About 40.0% of  
 171 cases and 8.2% of controls were delivered by cesarean section (C/S) mode of delivery and among those delivered  
 172 vaginally, 62.9% of cases and 92.6% of controls had spontaneous labor. We also checked if the mothers who were in  
 173 labor took any drugs. We found that 33.1% of cases and 26.4% of controls took some anti-pain or anesthetic drug.  
 174 Regarding the duration of labor and rupture of the membrane during the intrapartum period, more than half of the  
 175 cases (53.1%) and more than a third of the cases (34.9%) had more than 12 hours of duration, respectively. Of all the  
 176 study participants, 41.1% of cases and 14.4% of controls encountered labor and delivery-related complications. The



177 status of amniotic fluid was also an important variable, with 50.3% of cases and 85.3% of controls having clear  
 178 amniotic fluid status, which represented 73.4% of all index mothers (**Table 3**).

179 Table 3: Intra-partum Factors Associated with Hypoxic Ischemic Encephalopathy among Newborns Delivered at  
 180 Public Hospitals in Southern Ethiopia, 2023 (n=515)

| Variable                                       | Category               | Cases n=175 (%) | Controls n=340 (%) | Total n=515 (%) |
|------------------------------------------------|------------------------|-----------------|--------------------|-----------------|
| Presentation of the fetus                      | Cephalic               | 152 (86.9)      | 333 (97.9)         | 485 (94.2)      |
|                                                | Non cephalic           | 23 (13.1)       | 7 (2.1)            | 30 (5.8)        |
| Mode of delivery                               | Vaginal                | 105 (60.0)      | 312 (91.8)         | 417 (81.0)      |
|                                                | C/S                    | 70 (40.0)       | 28 (8.2)           | 98 (19.0)       |
| Types of vaginal MoD                           | Spontaneous            | 66 (62.9)       | 289 (92.6)         | 355 (85.1)      |
|                                                | Assisted*              | 39 (37.1)       | 23 (7.4)           | 62 (14.9)       |
| Types of C/S MoD                               | Emergency              | 56 (80.0)       | 25 (89.3)          | 81 (82.7)       |
|                                                | Elective               | 14 (20.0)       | 3 (10.7)           | 17 (17.3)       |
| Any drug used during labor                     | Yes                    | 127 (72.6)      | 216 (63.5)         | 343 (66.6)      |
|                                                | No                     | 48 (27.4)       | 124 (36.5)         | 172 (33.4)      |
| Types of Drugs given during labor and delivery | Anti-pain/ Anesthetics | 42 (33.1)       | 57 (26.4)          | 99 (28.9)       |
|                                                | Utero-tonics           | 38 (29.9)       | 121 (56.0)         | 159 (46.4)      |
|                                                | Other**                | 47 (37.0)       | 38 (17.6)          | 85 (24.8)       |
| The duration of labor                          | >12 hours              | 93 (53.1)       | 79 (23.2)          | 172 (33.4)      |
|                                                | <12 hours              | 82 (46.9)       | 261 (76.8)         | 343 (66.6)      |
| Duration of ROM                                | >12 hours              | 61 (34.9)       | 42 (12.4)          | 103 (20.0)      |
|                                                | <12 hours              | 114 (65.1)      | 298 (87.6)         | 412 (80.0)      |
| Any complications during labor?                | Yes                    | 72 (41.1)       | 49 (14.4)          | 121 (23.5)      |
|                                                | No                     | 103 (58.9)      | 291 (85.6)         | 394 (76.5)      |
| Types of complication occurred                 | Convulsion             | 24 (33.3)       | 15 (30.6)          | 39 (32.2)       |
|                                                | Fever                  | 16 (22.2)       | 23 (46.9)          | 39 (32.2)       |
|                                                | Excessive Bleeding     | 18 (25.0)       | 6 (12.2)           | 24 (19.8)       |
|                                                | Others***              | 14 (19.4)       | 5 (10.2)           | 19 (15.7)       |
| Status of amniotic fluid (Color)               | Clear                  | 88 (50.3)       | 290 (85.3)         | 378 (73.4)      |
|                                                | Meconium stained       | 77 (44.0)       | 33 (9.7)           | 110 (21.4)      |
|                                                | Bloody stained         | 10 (5.7)        | 17 (5.0)           | 27 (5.2)        |

181 \*: (forceps/vacuum), \*\*: Antihypertensive, Anticonvulsant, Anti-microbial, steroids, \*\*\*: Breech presentation, Cord  
 182 abnormality, fetal heart rate deprivation, MoD: Mode of Delivery; C/S: Cesarean Section

## 183 Nutritional related factors of neonatal hypoxic ischemic 184 encephalopathy

185 This study assessed the nutritional status of the mothers of newborns. The following figure clearly demonstrates that  
 186 meat and meat products were the most preferred food among the pregnant mothers of the newborns in our study. In  
 187 fact, more than half of the cases (58.3%) and the controls (50.0%) chose this food category over any other option  
 188 (**Fig 1**).

189 Figure 1: Preferred Foods of Pregnant Mothers of Newborns Delivered at Public Hospitals in Southern Ethiopia, 2023 (n=515)

190 We found that 96% of the cases and 98% of the controls had a feeding frequency of more than three times per day.  
191 However, only 35.4% of the mothers whose newborns had HIE (cases) and 47.9% of the mothers whose newborns  
192 did not have HIE (controls) did not have any knowledge about the balanced diet recommended during pregnancy.  
193 Moreover, 62.9% of the cases and 80.3% of the controls were unaware that some foods are not recommended during  
194 pregnancy.

## 195 **Neonatal factors associated with neonatal hypoxic ischemic** 196 **encephalopathy**

197 The neonates delivered had a balanced gender distribution. The average APGAR score was 7.06 (+SD = 1.444),  
198 indicating a good health status. The average birth weight of the newborns was 2873.2 grams ( $\pm$ SD = 480.171  
199 grams), and most of them, 66.3% of the cases and 80.0% of the controls, were within the normal range of 2501 -  
200 3999 grams (**Fig 2**). We also assessed intrauterine growth restriction (IUGR) immediately after delivery, and found  
201 that only a few neonates, 5.1% of the cases and 4.7% of the controls, had IUGR.

202 Figure 2: Birth weight of the newborns Delivered at Public Hospitals in Southern Ethiopia, 2023 (n=515)

## 203 **Factors associated with the occurrence of neonatal Hypoxic** 204 **Ischemic Encephalopathy**

205 To adjust for potential confounders, we performed a multivariable analysis with the following predictor variables  
206 that had a p-value of less than 0.2 in the binary logistic regression: index mother's occupation and education level,  
207 gestational age at delivery, ANC attendance during pregnancy, ultrasound examination during pregnancy, mode of  
208 delivery, drug use during labor, labor duration, ROM duration, index mother's knowledge of recommended foods  
209 during pregnancy and newborn's birth weight.

210 The multivariable logistic regression analysis model showed that the following variables were statistically  
211 significant: index mother's education level, gestational age at delivery, ultrasound checkup status during pregnancy,  
212 mode of delivery and labor duration. Neonates born to illiterate index mothers had more than twice the odds (AOR=  
213 1.913, 95%CI: 1.177, 3.109) of developing hypoxic ischemic encephalopathy than those born to literate mothers.

214 We assessed gestational age at delivery and found that preterm newborns (born before 37 weeks of gestation) had  
 215 nearly 4.5 times the odds (AOR= 4.467, 95%CI: 1.993, 10.012) and post-term newborns (born after 42 weeks of  
 216 gestation) had nearly 3 times the odds (AOR= 2.903, 95%CI: 1.325, 2.903) of developing hypoxic-ischemic  
 217 encephalopathy compared with term newborns (born between 38-42 weeks of gestation).

218 We also examined the effect of ultrasound examination during pregnancy and delivery method on hypoxic-ischemic  
 219 encephalopathy. We found that newborns whose mothers did not have an ultrasound examination during pregnancy  
 220 had twice the odds (AOR= 1.859, 95%CI: 1.073, 3.221) of developing hypoxic-ischemic encephalopathy than those  
 221 whose mothers did. Moreover, newborns delivered by cesarean section (C/S) had more than seven times the odds  
 222 (AOR= 7.569, 95%CI: 4.169, 13.741) of suffering from hypoxic-ischemic encephalopathy than those delivered  
 223 vaginally. We also found that labor duration was associated with hypoxic-ischemic encephalopathy. Newborns  
 224 delivered after prolonged labor ( $\geq 12$  hours) had 3.6 times the odds (AOR= 3.591, 95%CI: 2.067, 6.238) of  
 225 developing hypoxic-ischemic encephalopathy than those delivered after normal labor duration ( $\leq 12$  hours) (**Table4**).

226 Table 4: Bivariate and Multivariable Logistic Regression among Newborns Delivered at Public Hospitals in  
 227 Southern Ethiopia, 2023 (n=515)

| Variable                                                       | Category            | Case n=175 (%) | Control n=340 (%) | COR (95%CI)         | AOR (95% CI)               | P- value      |
|----------------------------------------------------------------|---------------------|----------------|-------------------|---------------------|----------------------------|---------------|
| Occupation of mother                                           | Unemployed          | 85 (48.6)      | 104 (30.6)        | 2.143 (1.472,3.120) | 1.450(0.911,2.308)         | 0.118         |
|                                                                | Employed            | 90 (51.4)      | 236 (69.4)        | 1                   | 1                          |               |
| Maternal educational status                                    | Literate            | 99 (56.6)      | 252 (74.1)        | 1                   | 1                          | <b>0.009*</b> |
|                                                                | Illiterate          | 76 (43.4)      | 88 (25.9)         | 2.198 (1.496,3.231) | <b>1.913(1.177,3.109)</b>  |               |
| Duration of current pregnancy                                  | $\leq 37$ (Preterm) | 66 (37.7)      | 105 (30.9)        | 2.804 (1.427,5.512) | <b>4.467(1.993,10.012)</b> | <b>0.000*</b> |
|                                                                | 42+ (post term)     | 13 (7.4)       | 58 (17.1)         | 2.420 (1.262,4.639) | <b>2.903(1.325, 2.903)</b> | <b>0.008*</b> |
|                                                                | 38 - 42 (Term)      | 96 (54.9)      | 177 (52.1)        | 1                   | 1                          |               |
| ANC visits during pregnancy                                    | Yes                 | 137 (78.3)     | 301 (88.5)        | 1                   | 1                          | 0.941         |
|                                                                | No                  | 38 (21.7)      | 39 (11.5)         | 2.141(1.311,3.495)  | 0.974(0.493,1.926)         |               |
| Ultrasound check up during pregnancy                           | Yes                 | 91 (52.0)      | 234 (68.8)        | 1                   | 1                          | <b>0.027*</b> |
|                                                                | No                  | 84 (48.0)      | 106 (31.2)        | 2.038(1.401,2.965)  | <b>1.859(1.073,3.221)</b>  |               |
| Mode of delivery                                               | Vaginal             | 105 (60.0)     | 312 (91.8)        | 1                   | 1                          | <b>0.000*</b> |
|                                                                | C/S                 | 70 (40.0)      | 28 (8.2)          | 7.429(4.547,12.137) | <b>7.569(4.169,13.741)</b> |               |
| Any drug used during labor                                     | Yes                 | 127 (72.6)     | 216 (63.5)        | 1.519(1.019, 2.263) | 0.651(0.393,1.077)         | 0.095         |
|                                                                | No                  | 48 (27.4)      | 124 (36.5)        | 1                   | 1                          |               |
| The duration of labor                                          | $>12$ hours         | 93 (53.1)      | 79 (23.2)         | 3.747(2.539,5.530)  | <b>3.591(2.067,6.238)</b>  | <b>0.000*</b> |
|                                                                | $<12$ hours         | 82 (46.9)      | 261 (76.8)        | 1                   | 1                          |               |
| The duration of ROM                                            | $>12$ hours         | 61 (34.9)      | 42 (12.4)         | 3.797(2.425, 5.944) | 1.076(0.566, 2.047)        | 0.823         |
|                                                                | $<12$ hours         | 114 (65.1)     | 298 (87.6)        | 1                   | 1                          |               |
| Knowledge of mothers on the recommended foods during pregnancy | Yes                 | 73 (41.7)      | 176 (51.8)        | 1                   | 1                          | 0.581         |
|                                                                | No                  | 102 (58.3)     | 164 (48.2)        | 1.499(1.038,2.167)  | 1.144(0.709,1.848)         |               |
| Wight of the newborn at birth                                  | $\leq 2500$ gram    | 42 (24.0)      | 57 (16.8)         | 1.728(1.097,2.720)  | 0.880(0.511,1.515)         | 0.644         |
|                                                                | 4000+ gram          | 17 (9.7)       | 11(3.2)           | 3.624(1.646,7.976)  | 2.679(0.972,7.382)         |               |
|                                                                | 2501-3999 gram      | 116 (66.3)     | 272 (80.0)        | 1                   | 1                          |               |

228 The asterisk (\*) denotes factors that were statistically significantly associated with hypoxic ischemic encephalopathy.

## 229 Discussion

230 This study identified several maternal and neonatal factors that were associated with increased risk of hypoxic  
231 ischemic encephalopathy (HIE) among newborns which is a serious condition that results from reduced oxygen  
232 supply and blood flow to the brain, leading to brain injury and potential long-term neurodevelopmental impairments  
233 [28]. The findings of this study have important implications for the prevention and management of HIE.

234 One maternal factor significantly associated with HIE was the index mother's education level. Newborns born to  
235 illiterate mothers had two times the odds of developing HIE than those born to literate mothers. This result is in line  
236 with a study conducted in Northern and Southern Ethiopia [7, 29]. The finding suggests that maternal literacy may  
237 influence the awareness and utilization of antenatal and intra-partum care services, which are essential for detecting  
238 and preventing complications that may cause HIE [30]. Maternal literacy may also affect the knowledge and practice  
239 of healthy behaviors during pregnancy, such as nutrition, hygiene, and infection prevention [18, 31]. Therefore,  
240 improving maternal education and empowerment may be a key strategy to reduce the risk of HIE among newborns.

241 This study identified ultrasound checkup status during pregnancy and gestational age at delivery as maternal factors  
242 associated with HIE. Newborns whose mothers did not have an ultrasound checkup during pregnancy had higher  
243 odds of developing HIE than those whose mothers did, which is in line with previous studies done in Cameroon and  
244 Istanbul [18, 32]. Ultrasound checkup is a valuable tool for detecting and preventing conditions that may cause HIE,  
245 such as fetal anomalies, growth restriction, placental abnormalities, and abnormal fetal presentation. Ultrasound  
246 checkups may also help determine the gestational age and the optimal timing and mode of delivery, which are  
247 essential for avoiding preterm and post-term births. Both preterm and post-term births were found to increase the  
248 risk of HIE in this study, as well as in other studies done in Australia, Northern Ethiopia, and Addis Ababa [7, 29,  
249 33, 34].

250 Preterm newborns (born before 37 weeks of gestation) had 4.5 times the odds of developing HIE, while post-term  
251 newborns (born after 42 weeks of gestation) had 3 times the odds of developing HIE compared with term newborns.  
252 These findings are consistent with recent studies that have suggested that post-term birth may be associated with  
253 placental insufficiency, fetal distress, meconium aspiration, and birth trauma, which may compromise the oxygen  
254 supply and blood flow to the brain [35, 36]. Therefore, this study recommends ensuring access and availability of

255 ultrasound checkups during pregnancy and monitoring gestational age at delivery as effective measures to prevent  
256 HIE.

257 The mode of delivery was another factor that influenced the risk of HIE. Newborns delivered by cesarean section  
258 (C/S) had more than 7 times the odds of developing HIE than those delivered vaginally. This is consistent with  
259 several studies conducted in Cameroon, Istanbul, and Northern Ethiopia [18, 19, 37]. This finding may reflect the  
260 fact that C/S is often performed as an emergency intervention when there is fetal distress or other complications that  
261 may compromise the oxygen supply to the fetus. However, C/S may also pose some risks for the newborn, such as  
262 respiratory distress syndrome, transient tachypnea, and iatrogenic prematurity [38]. Therefore, C/S should be  
263 reserved for cases where there is a clear indication and benefit for the mother and the fetus and performed with  
264 adequate monitoring and care to minimize the risk of HIE.

265 The labor duration was another factor that affected the risk of HIE. Newborns delivered after prolonged labor ( $\geq 12$   
266 hours) had 3.6 times the odds of developing HIE than those delivered after normal labor duration ( $\leq 12$  hours). This  
267 finding is consistent with previous studies conducted in developed and developing countries that have shown that  
268 prolonged labor is associated with increased risk of fetal hypoxia, acidosis, meconium aspiration, infection, and birth  
269 trauma [7, 39, 40]. Prolonged labor may also result from cephalopelvic disproportion or malposition of the fetus,  
270 which may require instrumental delivery or C/S [41]. Therefore, timely detection and management of prolonged  
271 labor is essential for preventing HIE and its sequelae.

272 This study has some limitations that warrant further discussion. First, it relied on clinical biomarkers without  
273 laboratory or imaging investigation, which could introduce some subjectivity bias in the diagnosis. Second, it  
274 excluded private health institutions, health centers and health posts that offer substantial maternal and child health  
275 related services due to budget constraints, which could limit its applicability to other populations or contexts. Third,  
276 it did not evaluate the severity or outcome of HIE among newborns, which could vary depending on the extent and  
277 location of brain damage.

278 Despite these limitations, this study provides valuable insights into the risk factors for HIE among newborns in  
279 Ethiopia. It was regional and included most tertiary care hospitals that have a wide catchment population and used a  
280 relatively large sample size. The findings suggest that improving maternal education and health care services during

281 pregnancy and delivery may help reduce the incidence and severity of HIE. Future research should explore the  
282 mechanisms and pathways by which these factors influence the risk of HIE, as well as the long-term outcomes and  
283 interventions for newborns with HIE.

## 284 **Conclusion**

285 This study aimed to identify the maternal and neonatal factors that are associated with hypoxic ischemic  
286 encephalopathy (HIE) among newborns in Southern Ethiopia. HIE is a serious condition that results from reduced  
287 oxygen supply and blood flow to the brain, leading to brain injury and potential long-term neurodevelopmental  
288 impairments. The study found that maternal education, ultrasound checkup status, gestational age at delivery, mode  
289 of delivery, and labor duration were significantly associated with HIE. Newborns born to illiterate mothers, those  
290 whose mothers did not have an ultrasound checkup during pregnancy, those who were born preterm or post-term,  
291 those who were delivered by cesarean section, and those who were delivered after prolonged labor had higher odds  
292 of developing HIE than their counterparts. These findings suggest that improving maternal education and health care  
293 services during pregnancy and delivery may help reduce the incidence and severity of HIE. This study recommends  
294 future research to use laboratory or imaging investigations, including private health institutions, and explore the  
295 mechanisms and outcomes of HIE. It also recommends health care providers to ensure ultrasound checkup, monitor  
296 gestational age and mode of delivery, and detect and manage prolonged labor.

## 297 **Abbreviations and acronyms**

298 ANC: Antenatal Clinic; AOR: Adjusted Odds Ratio, APGAR: Activity-Pulse-Grimace-Appearance-Respiration;  
299 C/S: Cesarean Section; CI: Confidence Interval; HIE: Hypoxic Ischemic Encephalopathy; IRB: Institutional Review  
300 Board; IUGR: Intrauterine Growth Restriction; LBW: Low Birth Weight; ROM: Rupture of Membrane; SD:  
301 Standard Deviation; SNNPR: South Nation Nationalities People's Region

302

303

## 304 **Acknowledgements:**

305 We are deeply grateful to the SNNPR of Ethiopia health department for their cooperation and permission to conduct  
306 this study in the area. We also appreciate the personnel of selected hospitals and the women with their neonate who  
307 participated in this study for their invaluable contributions. Moreover, we thank the data collectors and supervisors  
308 for their role in data collection and the anonymous reviewers for their constructive comments and suggestions that  
309 enhanced the quality of the manuscript.

## 310 **References**

- 311 [1] Yıldız EP, *et al.* Neonatal hypoxic ischemic encephalopathy: an update on disease pathogenesis and treatment.  
312 2017;17(5):449-59.
- 313 [2] Zewdie R, *et al.* Treatment device for neonatal birth asphyxia related Hypoxic Ischemic Encephalopathy.  
314 2021;21:1-9.
- 315 [3] Kharoshankaya L, *et al.* Seizure burden and neurodevelopmental outcome in neonates with hypoxic–ischemic  
316 encephalopathy. 2016;58(12):1242-8.
- 317 [4] Goldenberg RL, *et al.* Stillbirths: the hidden birth asphyxia—US and Global perspectives. 2016;43(3):439-53.
- 318 [5] McIntyre S, *et al.*, editors. Neonatal encephalopathy: Focus on epidemiology and underexplored aspects of  
319 etiology. Seminars in Fetal and Neonatal Medicine; 2021: Elsevier.
- 320 [6] Simiyu IN, *et al.* Prevalence, severity and early outcomes of hypoxic ischemic encephalopathy among newborns  
321 at a tertiary hospital, in northern Tanzania. 2017;17:1-6.
- 322 [7] Abdo RA, *et al.* Prevalence and contributing factors of birth asphyxia among the neonates delivered at Nigist  
323 Eleni Mohammed memorial teaching hospital, Southern Ethiopia: a cross-sectional study. 2019;19:1-7.
- 324 [8] Aliyu I, *et al.* Hypoxic-ischemic encephalopathy and the Apgar scoring system: The experience in a resource-  
325 limited setting. 2018;15(1):18.
- 326 [9] Greco P, *et al.* Pathophysiology of hypoxic–ischemic encephalopathy: a review of the past and a view on the  
327 future. 2020;120:277-88.
- 328 [10] Wu Y, *et al.* Clinical features, diagnosis, and treatment of neonatal encephalopathy. 2014.



- 329 [11] Mengesha HG, Sahle BWJBph. Cause of neonatal deaths in Northern Ethiopia: a prospective cohort study.  
330 2017;17(1):1-8.
- 331 [12] Wolde HF, *et al.* Factors affecting neonatal mortality in the general population: evidence from the 2016  
332 Ethiopian Demographic and Health Survey (EDHS)—multilevel analysis. 2019;12(1):1-6.
- 333 [13] Sitthivuddhi Futrakul M, *et al.* Risk factors for hypoxic-ischemic encephalopathy in asphyxiated newborn  
334 infants. 2006;89(3):322-8.
- 335 [14] Getaneh FB, *et al.* Survival and predictors of asphyxia among neonates admitted in neonatal intensive care units  
336 of public hospitals of Addis Ababa, Ethiopia, 2021: a retrospective follow-up study. 2022;22(1):1-13.
- 337 [15] Peebles PJ, *et al.* Antenatal and intrapartum risk factors for neonatal hypoxic ischemic encephalopathy.  
338 2020;40(1):63-9.
- 339 [16] Goswami I, *et al.*, editors. Predictors of long-term neurodevelopmental outcome of hypoxic-ischemic  
340 encephalopathy treated with therapeutic hypothermia. *Seminars in Neurology*; 2020: Thieme Medical Publishers.
- 341 [17] Peebles ES, *et al.* Predictive models of neurodevelopmental outcomes after neonatal hypoxic-ischemic  
342 encephalopathy. 2021;147(2).
- 343 [18] ÜSTÜN NJActJoMS. Evaluation of risk factors for neonatal hypoxic ischemic encephalopathy.27(1):32-8.
- 344 [19] Tochie JN, *et al.* The epidemiology, risk factors, mortality rate, diagnosis, etiologies and treatment of neonatal  
345 respiratory distress: a scoping review. 2020.
- 346 [20] Tiozzo C, Mukhopadhyay SJPr. Noninfectious influencers of early-onset sepsis biomarkers. 2022;91(2):425-31.
- 347 [21] AlMuqbil M, *et al.* Clinical Characteristics and Risk Factors of Neonatal Hypoxic-Ischaemic Encephalopathy  
348 and Its Associated Neurodevelopmental Outcomes During the First Two Years of Life: A Retrospective Study in  
349 Saudi Arabia. 2023:525-36.
- 350 [22] Lemma K, *et al.* Determinants of birth asphyxia among newborn live births in public hospitals of Gamo and  
351 Gofa zones, Southern Ethiopia. 2022;22(1):280.
- 352 [23] Tann CJ, *et al.* Perinatal risk factors for neonatal encephalopathy: an unmatched case-control study.  
353 2018;103(3):F250-F6.
- 354 [24] Wosenu L, *et al.* Determinants of birth asphyxia among live birth newborns in University of Gondar referral  
355 hospital, northwest Ethiopia: A case-control study. 2018;13(9):e0203763.
- 356 [25] Association WM. Declaration of Helsinki. Medical research involving human subjects. 2017. 2017.



- 357 [26] Shrestha B, Dunn LJJoNHRC. The declaration of Helsinki on medical research involving human subjects: a  
358 review of seventh revision. 2019;17(4):548-52.
- 359 [27] Organization WH. Standards and operational guidance for ethics review of health-related research with human  
360 participants: World Health Organization; 2011.
- 361 [28] Fatemi A, *et al.* Hypoxic-ischemic encephalopathy in the term infant. 2009;36(4):835-58.
- 362 [29] Tasew H, *et al.* Risk factors of birth asphyxia among newborns in public hospitals of Central Zone, Tigray,  
363 Ethiopia 2018. 2018;11:1-7.
- 364 [30] Yvonne WJU. Clinical features, diagnosis, and treatment of neonatal encephalopathy. 2018.
- 365 [31] Herranz-Rubia N, *et al.* Applying qualitative research to develop a guide for parents of newborns with hypoxic-  
366 ischemic encephalopathy. 2020;19:1609406920923426.
- 367 [32] Foumane P, *et al.* Risk factors of clinical birth asphyxia and subsequent newborn death following nuchal cord  
368 in a low-resource setting. 2013;2013.
- 369 [33] Mulugeta T, *et al.* Risk factors of perinatal asphyxia among newborns delivered at public hospitals in Addis  
370 Ababa, Ethiopia: case-control study. 2020;297-306.
- 371 [34] Gopagondanahalli KR, *et al.* Preterm hypoxic-ischemic encephalopathy. 2016;4:114.
- 372 [35] Seikku L, *et al.* Asphyxia, neurologic morbidity, and perinatal mortality in early-term and postterm birth.  
373 2016;137(6).
- 374 [36] Lundgren C, *et al.* Ante-and intrapartum risk factors for neonatal hypoxic ischemic encephalopathy.  
375 2018;31(12):1595-601.
- 376 [37] Bayih WA, *et al.* The state of birth asphyxia in Ethiopia: An umbrella review of systematic review and meta-  
377 analysis reports, 2020. 2021;7(10):e08128.
- 378 [38] Umbwiyeneza J. Effect of mode of delivery on outcomes of full term neonates admitted in a tertiary Hospital of  
379 Kigali 2017.
- 380 [39] Laughon SK, *et al.* Neonatal and maternal outcomes with prolonged second stage of labor. 2014;124(1):57.
- 381 [40] Martinez-Biarge M, *et al.* Risk factors for neonatal arterial ischemic stroke: the importance of the intrapartum  
382 period. 2016;173:62-8. e1.
- 383 [41] Simkin P, *et al.* The labor progress handbook: early interventions to prevent and treat dystocia: John Wiley &  
384 Sons; 2017.



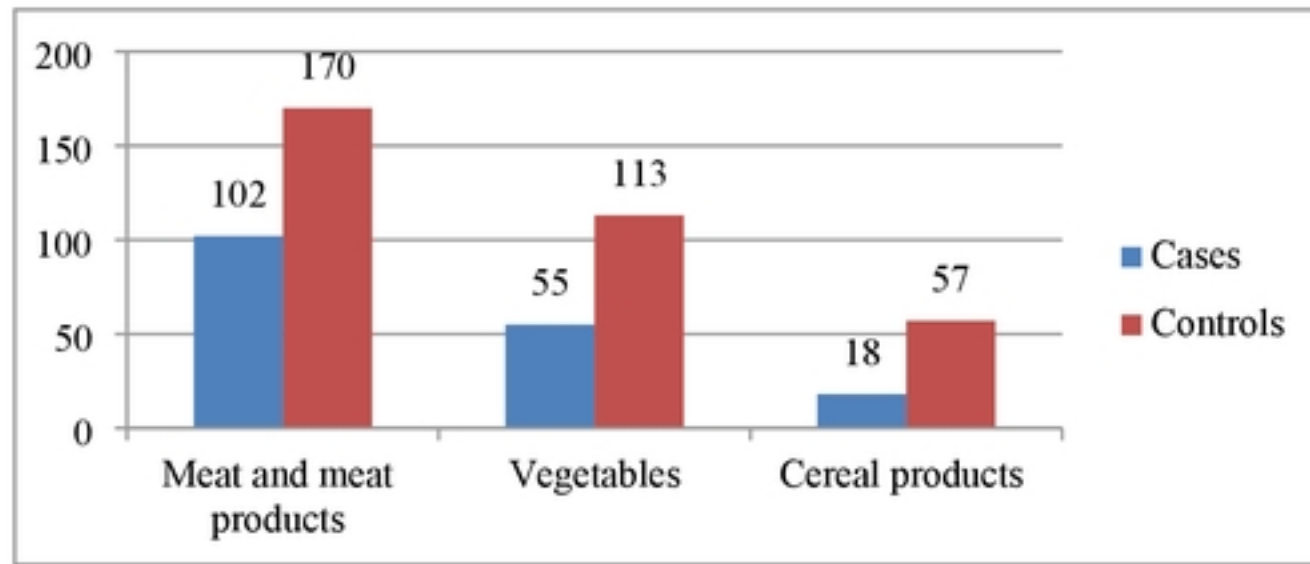

Fig 1:

medRxiv preprint doi: <https://doi.org/10.1101/2023.05.28.23290654>; this version posted June 1, 2023. The copyright holder for this preprint (which was not certified by peer review) is the author/funder, who has granted medRxiv a license to display the preprint in perpetuity. It is made available under a [CC-BY 4.0 International license](https://creativecommons.org/licenses/by/4.0/).

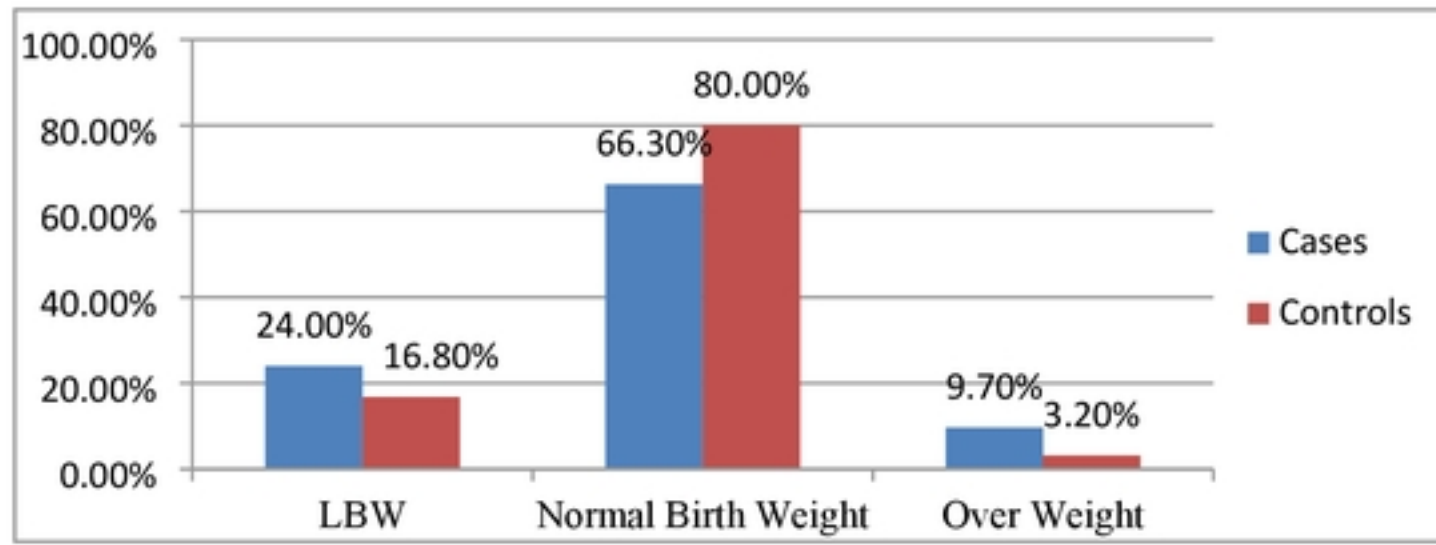

**Fig 2:**

medRxiv preprint doi: <https://doi.org/10.1101/2023.05.28.23290654>; this version posted June 1, 2023. The copyright holder for this preprint (which was not certified by peer review) is the author/funder, who has granted medRxiv a license to display the preprint in perpetuity. It is made available under a [CC-BY 4.0 International license](https://creativecommons.org/licenses/by/4.0/).
